# Supplementary material for: CX3CL1 promotes cell sensitivity to ferroptosis and is associated with the tumor microenvironment in clear cell renal cell carcinoma
Source: PubMed Central journal article supplement (PMC9670481; doi:10.1186/s12885-022-10302-2), 2022-11-17
Supplement: 12885_2022_10302_MOESM2_ESM.pdf [file 12885_2022_10302_MOESM2_ESM.pdf]

## activated NK cells

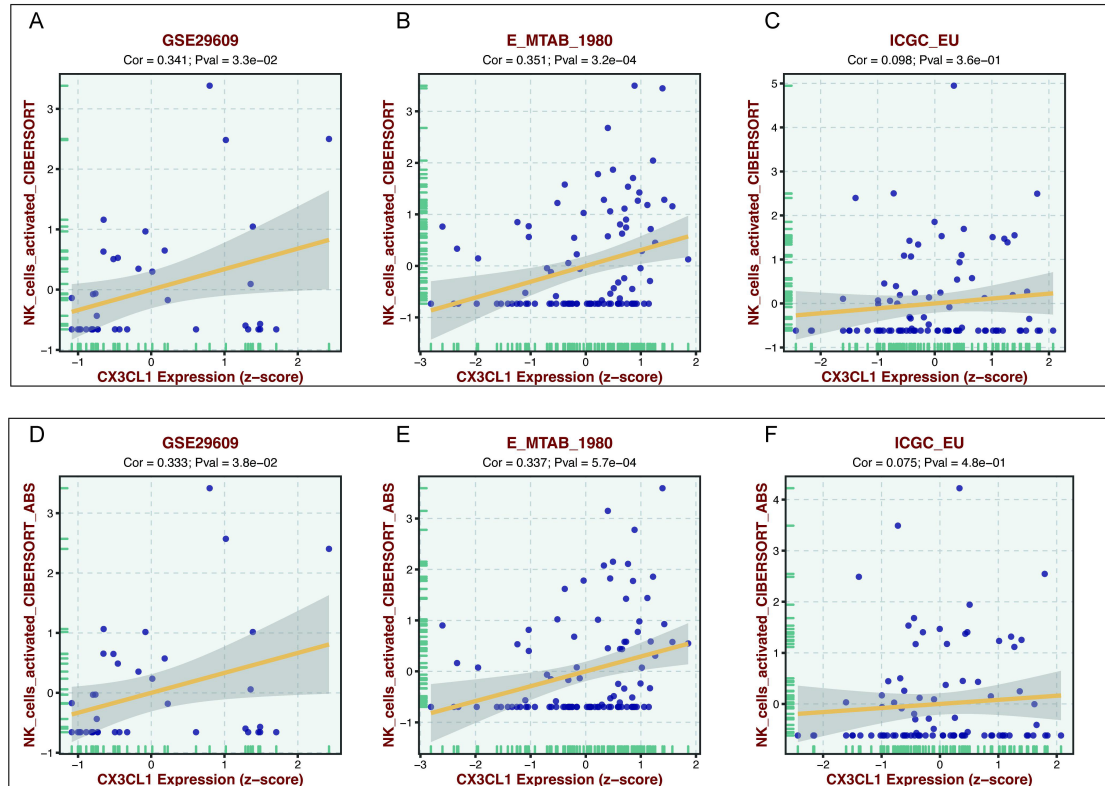

**Supplementary Fig 1.** The association between CX3CL1 expression and NK cells. (A–C) The relationship between activated NK cells and the expression level of CX3CL1 in GSE29609, E\_MTAB\_1980, and ICGC\_EU cohorts determined using CIBERSORT. (D–F) The relationship between activated NK cells and the expression level of CX3CL1 in GSE29609, E\_MTAB\_1980, and ICGC\_EU cohorts determined using CIBERSORT\_ABS.
