# Supplementary material for: CX3CL1 promotes cell sensitivity to ferroptosis and is associated with the tumor microenvironment in clear cell renal cell carcinoma
Source: PubMed Central journal article supplement (PMC9670481; doi:10.1186/s12885-022-10302-2), 2022-11-17
Supplement: 12885_2022_10302_MOESM3_ESM.pdf [file 12885_2022_10302_MOESM3_ESM.pdf]

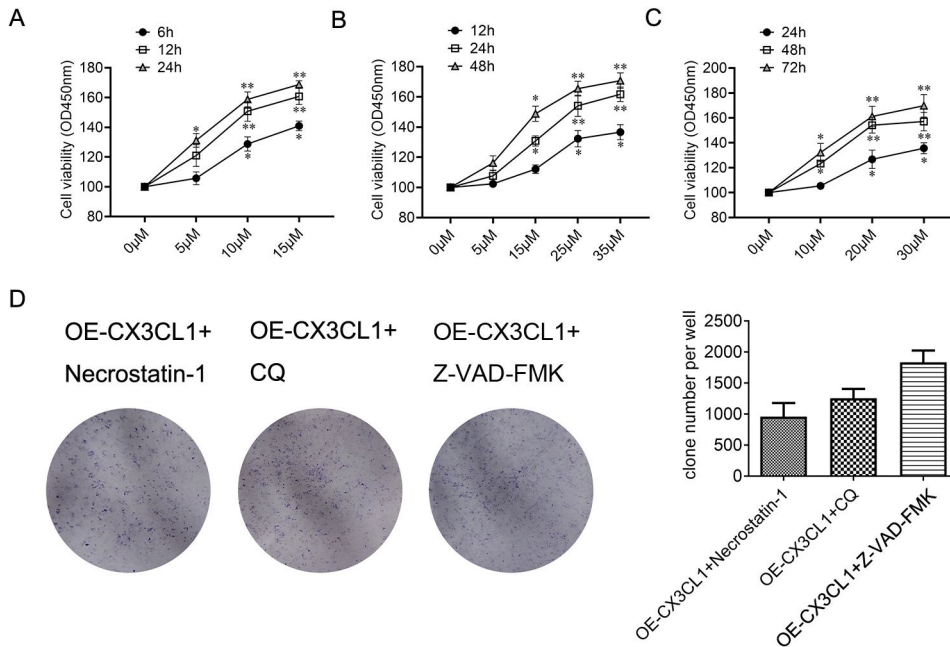

**Supplementary Fig 2.** The relationship between CX3CL1 and necroptosis, autophagy, and apoptosis. (A) 786-O cells were incubated with Necrostatin-1 (0, 5, 10, 15 μM/ml) for 6, 12, and 24 h. Then cell viability was estimated using the CCK-8 assay. (B) 786-O cells were incubated with CQ (0, 5, 15, 25 and 35 μM/ml) for 12, 24, and 48 h. Then cell viability was estimated using the CCK-8 assay. (C) 786-O cells were incubated with Z-VAD-FMK (0, 10, 20, and 30 μM/ml) for 24, 48, and 72 h. Then cell viability was estimated using the CCK-8 assay. (D) Cell colonies of 786-O cells.
