# Supplementary material for: CX3CL1 promotes cell sensitivity to ferroptosis and is associated with the tumor microenvironment in clear cell renal cell carcinoma
Source: PubMed Central journal article supplement (PMC9670481; doi:10.1186/s12885-022-10302-2), 2022-11-17
Supplement: 12885_2022_10302_MOESM5_ESM.pdf [file 12885_2022_10302_MOESM5_ESM.pdf]

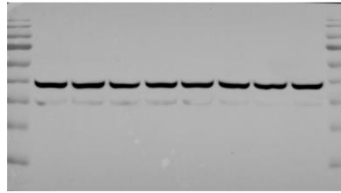

Actin

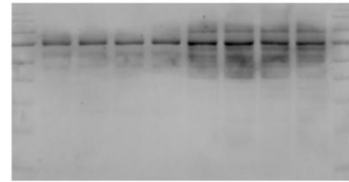

CX3CL1

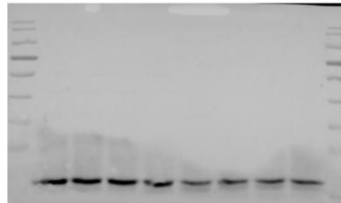

GPX4

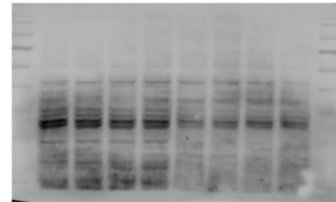

PCNA

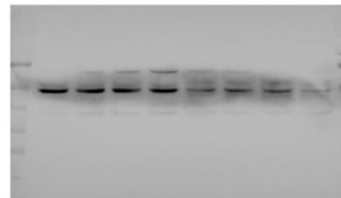

XCT

**Supplementary Fig 4.** The full-length blots of Actin, CX3CL1, GPX4, PCNA and XCT in *vivo*.
